# Supplementary material
Source: HighWire-hosted journal article supplement (https://ajnr-sso.highwirestaging.com/highwire/filestream/101975/field_highwire_adjunct_files/0/0977.pdf)
Supplement: 0977.pdf [file 0977.pdf]

## Supplemental Tables

Table 1: Patient and aneurysm characteristics for unruptured and ruptured aneurysms

| Characteristics                                                        | Unruptured aneurysms                     |                           |                              |                                        |                            |                   | Ruptured aneurysms                       |                           |                                        |                          |
|------------------------------------------------------------------------|------------------------------------------|---------------------------|------------------------------|----------------------------------------|----------------------------|-------------------|------------------------------------------|---------------------------|----------------------------------------|--------------------------|
| Patient age                                                            | 55 ± 12 years<br>(27 -79 years)          |                           |                              |                                        |                            |                   | 55 ± 10 years<br>(36 -71 years)          |                           |                                        |                          |
| Aneurysm location                                                      | ICA<br>109 (76.2%)                       | BA<br>9 (6.3%)            | MCA<br>9 (6.3%)              | VA<br>6 (4.2%)                         | ACOM<br>6 (4.2%)           | Other<br>4 (2.8%) | ICA<br>8 (44.4%)                         | BA<br>4 (22.2%)           | VA<br>3 (16.7%)                        | Other<br>3 (16.7%)       |
| Aneurysm size <sup>1</sup> [mm]                                        | 8.4 ± 6.4<br>(2.0 – 46.0)                |                           |                              |                                        |                            |                   | 3.3 ± 2.0<br>(1.0 – 8.0)                 |                           |                                        |                          |
| Neck diameter [mm]                                                     | 4.9 ± 3.9<br>(1.0 – 36.0)                |                           |                              |                                        |                            |                   | 2.8 ± 1.9<br>(1.0 – 6.2)                 |                           |                                        |                          |
| Dome-to-neck ratio                                                     | 1.7 ± 0.8<br>(0.4 – 5.1)                 |                           |                              |                                        |                            |                   | 1.6 ± 1.6<br>(0.9 – 7.5)                 |                           |                                        |                          |
| Diameter of the parent artery proximal and distal to the aneurysm [mm] | Proximal<br><br>3.6 ± 0.8<br>(1.5 – 7.0) |                           |                              | Distal<br><br>3.1 ± 0.7<br>(1.3 – 5.2) |                            |                   | Proximal<br><br>3.0 ± 0.7<br>(1.9 – 4.3) |                           | Distal<br><br>2.5 ± 0.8<br>(1.2 – 4.0) |                          |
| Aneurysm type                                                          | Saccular<br><br>126 (88.1%)              | Fusiform<br><br>10 (7.0%) | Blister-like<br><br>5 (3.5%) |                                        | Dissecting<br><br>2 (1.4%) |                   | Blister-like<br><br>9 (50.0%)            | Saccular<br><br>5 (27.8%) | Dissecting<br><br>3 (16.7%)            | Fusiform<br><br>1 (5.6%) |
| Sidewall or bifurcation aneurysm                                       | Sidewall<br><br>122 (85.3%)              |                           |                              | Bifurcation<br><br>21 (14.7%)          |                            |                   | Sidewall<br><br>14 (77.8%)               |                           | Bifurcation<br><br>4 (22.2%)           |                          |

Data indicated as Mean ± standard deviation (minimum – maximum) or absolute number of cases (relative frequency in %). ICA: internal carotid artery; BA: basilar artery; PCOM: posterior communicating artery; MCA: middle cerebral artery; VA: vertebral artery; <sup>1</sup>maximal diameter

**Table 2:** Treatment parameters, complications and occlusion rates

| Treatment parameters                                  | Unruptured aneurysms                               |                                   |                                 |                                    |                                      | Ruptured aneurysms                               |                                    |                                 |                                                                       |                       |
|-------------------------------------------------------|----------------------------------------------------|-----------------------------------|---------------------------------|------------------------------------|--------------------------------------|--------------------------------------------------|------------------------------------|---------------------------------|-----------------------------------------------------------------------|-----------------------|
| Aneurysms treated in the respective treatment session | One<br>128 (89.5%)                                 | Two<br>11 (77.7%)                 | Three<br>2 (1.4%)               | Four<br>2 (1.4%)                   |                                      | One<br>16 (88.9%)                                |                                    | Two<br>2 (11.1%)                |                                                                       |                       |
| Additional coiling                                    | 45 (31.5%)                                         |                                   |                                 |                                    |                                      | 3 (16.7%)                                        |                                    |                                 |                                                                       |                       |
| In-stent PTA                                          | 4 (2.8%)                                           |                                   |                                 |                                    |                                      | 0 (0%)                                           |                                    |                                 |                                                                       |                       |
| Adverse events and complications                      |                                                    |                                   |                                 |                                    |                                      |                                                  |                                    |                                 |                                                                       |                       |
| Adverse event                                         | Technical periprocedural adverse event<br>5 (3.5%) | Minor adverse event<br>17 (11.9%) | Major adverse event<br>4 (2.8%) | Neurological morbidity<br>2 (1.4%) | Mortality<br>1 (0.7%)                | Technical periprocedural adverse event<br>0 (0%) | Minor adverse event<br>4 (22.2%)   | Major adverse event<br>1 (5.6%) | Neurological morbidity<br>1 (5.6%)                                    | Mortality<br>1 (5.6%) |
| Occlusion rates                                       |                                                    |                                   |                                 |                                    |                                      |                                                  |                                    |                                 |                                                                       |                       |
| Occlusion at latest follow-up <sup>7</sup>            | I: Complete occlusion<br>88 (68.2%)                |                                   | II: Residual neck<br>21 (16.3%) |                                    | III: Residual aneurysm<br>20 (15.5%) |                                                  | I: Complete occlusion<br>6 (46.2%) |                                 | II: Residual neck<br>3 (23.1%)<br>III: Residual aneurysm<br>4 (30.8%) |                       |

Data indicated as absolute number of cases (relative frequency in %). <sup>1</sup>Imaging follow-up was available for 142/161 patients with a mean follow-up period: 7.0 months, reported according to the Raymond-Roy classification.

**Supplemental Table 3: Adverse events and complications (unruptured and ruptured aneurysms)**

| Adverse event                     | No. of observed events      | Intra-procedural          | Post-procedural             | Minor adverse event <sup>1</sup> | Major adverse event <sup>2</sup> | Neurological complication  | Neurological morbidity    | Mortality                 |
|-----------------------------------|-----------------------------|---------------------------|-----------------------------|----------------------------------|----------------------------------|----------------------------|---------------------------|---------------------------|
| <b>Asymptomatic adverse event</b> |                             |                           |                             |                                  |                                  |                            |                           |                           |
| Fishmouthing                      | 8<br>(5.0%)                 | 0<br>(0%)                 | 8<br>(5.0%)                 | -                                | -                                | -                          | -                         | -                         |
| Stent thrombosis                  | 5<br>(3.1%)                 | 4<br>(2.5%)               | 1<br>0.6%                   | -                                | -                                | -                          | -                         | -                         |
| Insufficient opening              | 1<br>(0.6%)                 | 1<br>(0.6%)               | 0<br>(0%)                   | -                                | -                                | -                          | -                         | -                         |
| Stent shortening                  | 2<br>(0.6%)                 | 2<br>(1.2%)               | 0<br>(0%)                   | -                                | -                                | -                          | -                         | -                         |
| Kinking of device                 | 1<br>(0.6%)                 | 1<br>(0.6%)               | 0<br>(0%)                   | -                                | -                                | -                          | -                         | -                         |
| Coil migration                    | 1<br>(0.6%)                 | 1<br>(0.6%)               | 0<br>(0%)                   | -                                | -                                | -                          | -                         | -                         |
| Radial artery occlusion           | 1<br>(0.6%)                 | 0<br>(0%)                 | 1<br>(0.6%)                 | -                                | -                                | -                          | -                         | -                         |
| <b>Summary</b>                    | <b>21</b><br><b>(13.0%)</b> | <b>9</b><br><b>(5.6%)</b> | <b>12</b><br><b>(7.5%)</b>  | -                                | -                                | -                          | -                         | -                         |
| <b>Symptomatic adverse events</b> |                             |                           |                             |                                  |                                  |                            |                           |                           |
| Groin hematoma                    | 5<br>(3.1%)                 | 1<br>(0.6%)               | 4<br>(2.5%)                 | 5<br>(3.1%)                      | 0<br>(0%)                        | 0<br>(0%)                  | 0<br>(0%)                 | 0<br>(0%)                 |
| Visual disturbances               | 5<br>(3.1%)                 | 0<br>(0%)                 | 5<br>(3.1%)                 | 5<br>(3.1%)                      | 0<br>(0%)                        | 0<br>(0%)                  | 0<br>(0%)                 | 0<br>(0%)                 |
| Ischemic stroke                   | 4<br>(2.5%)                 | 0<br>(0%)                 | 4<br>(2.5%)                 | 2<br>(1.2%)                      | 2<br>(1.2%)                      | 4<br>(2.5%)                | 2<br>(1.2%)               | 0<br>(0%)                 |
| Stent thrombosis                  | 3<br>(1.9%)                 | 0<br>(0%)                 | 3<br>(1.9%)                 | 1<br>(0.6%)                      | 2<br>(1.9%)                      | 3<br>(2.5%)                | 1<br>(0.6%)               | 0<br>(0%)                 |
| TIA                               | 2<br>(1.9%)                 | 0<br>(0%)                 | 2<br>(1.9%)                 | 2<br>(1.2%)                      | 0<br>(0%)                        | 2<br>(1.9%)                | 0<br>(0%)                 | 0<br>(0%)                 |
| Vasospasm <sup>3</sup>            | 1<br>(0.6%)                 | 0<br>(0%)                 | 1<br>(0.6%)                 | 1<br>(0.6%)                      | 1<br>(0.6%)                      | 1<br>(0.6%)                | 1<br>(0.6%)               | 0<br>(0%)                 |
| CA-induced encephalopathy         | 1<br>(0.6%)                 | 0<br>(0%)                 | 1<br>(0.6%)                 | 1<br>(0.6%)                      | 0<br>(0%)                        | 1<br>(0.6%)                | 0<br>(0%)                 | 0<br>(0%)                 |
| Intracerebral hemorrhage          | 1<br>(0.6%)                 | 0<br>(0%)                 | 1<br>(0.6%)                 | 0<br>(0%)                        | 1<br>(0.6%)                      | 1<br>(0.6%)                | 0<br>(0%)                 | 1<br>(0.6%)               |
| Seizure                           | 1<br>(0.6%)                 | 0<br>(0%)                 | 1<br>(0.6%)                 | 1<br>(0.6%)                      | 0<br>(0%)                        | 1<br>(0.6%)                | 0<br>(0%)                 | 0<br>(0%)                 |
| Mass effect                       | 1<br>(0.6%)                 | 0<br>(0%)                 | 1<br>(0.6%)                 | 0<br>(0%)                        | 1<br>(0.6%)                      | 1<br>(0.6%)                | 0<br>(0%)                 | 1<br>(0.6%)               |
| Epistaxis                         | 1<br>(0.6%)                 | 0<br>(0%)                 | 1<br>(0.6%)                 | 1<br>(0.6%)                      | 0<br>(0%)                        | 0<br>(0%)                  | 0<br>(0%)                 | 0<br>(0%)                 |
| CA allergy                        | 1<br>(0.6%)                 | 0<br>(0%)                 | 1<br>(0.6%)                 | 1<br>(0.6%)                      | 0<br>(0%)                        | 0<br>(0%)                  | 0<br>(0%)                 | 0<br>(0%)                 |
| <b>Summary<sup>4</sup></b>        | <b>24</b><br><b>(14.9%)</b> | <b>1</b><br><b>(0.6%)</b> | <b>23</b><br><b>(14.3%)</b> | <b>21</b><br><b>(13.0%)</b>      | <b>5</b><br><b>(3.1%)</b>        | <b>12</b><br><b>(7.5%)</b> | <b>3</b><br><b>(1.9%)</b> | <b>2</b><br><b>(1.2%)</b> |

CA: contrast agent; <sup>1</sup>event which resolved within 7 days without any clinical sequelae; <sup>2</sup>ongoing clinical deficit at 7 days following the event; <sup>3</sup>related to subarachnoid hemorrhage; <sup>4</sup>for directly related adverse events (one case of intracerebral hemorrhage leading to a stop of the antiplatelet therapy, resulting in stent thrombosis and fatal major ischemic stroke and one case of stent thrombosis leading to major ischemic stroke, resulting in neurological morbidity) only the initiating event is counted in the summary
